# Supplementary material
Source: PubMed Central journal article supplement (PMC4722869)
Supplement: NIHMS748644-supplement-suppl.pdf [file NIHMS748644-supplement-suppl.pdf]

A

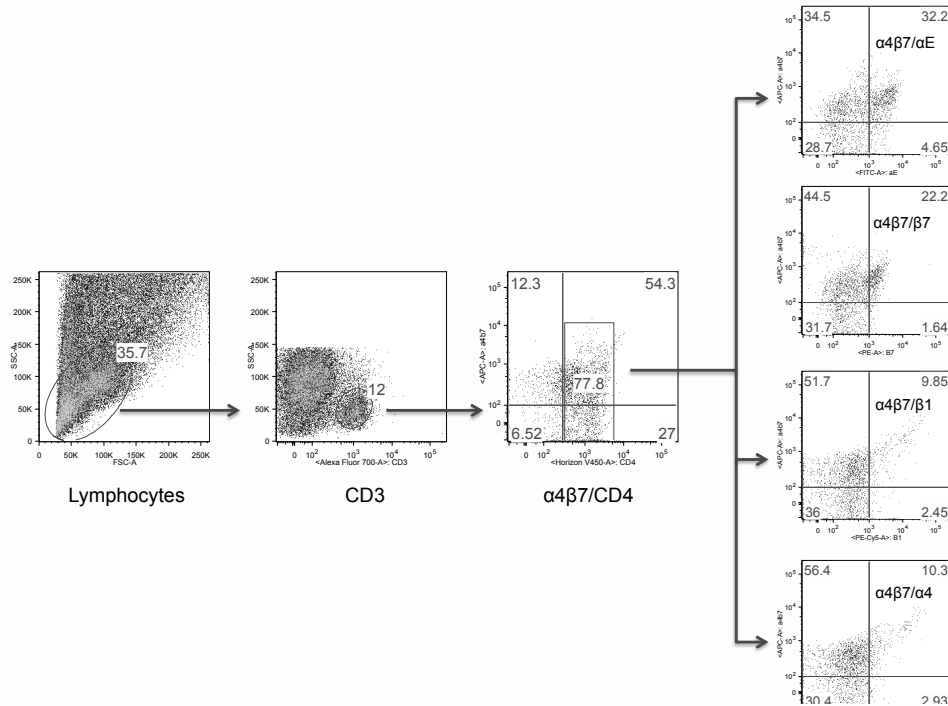

B

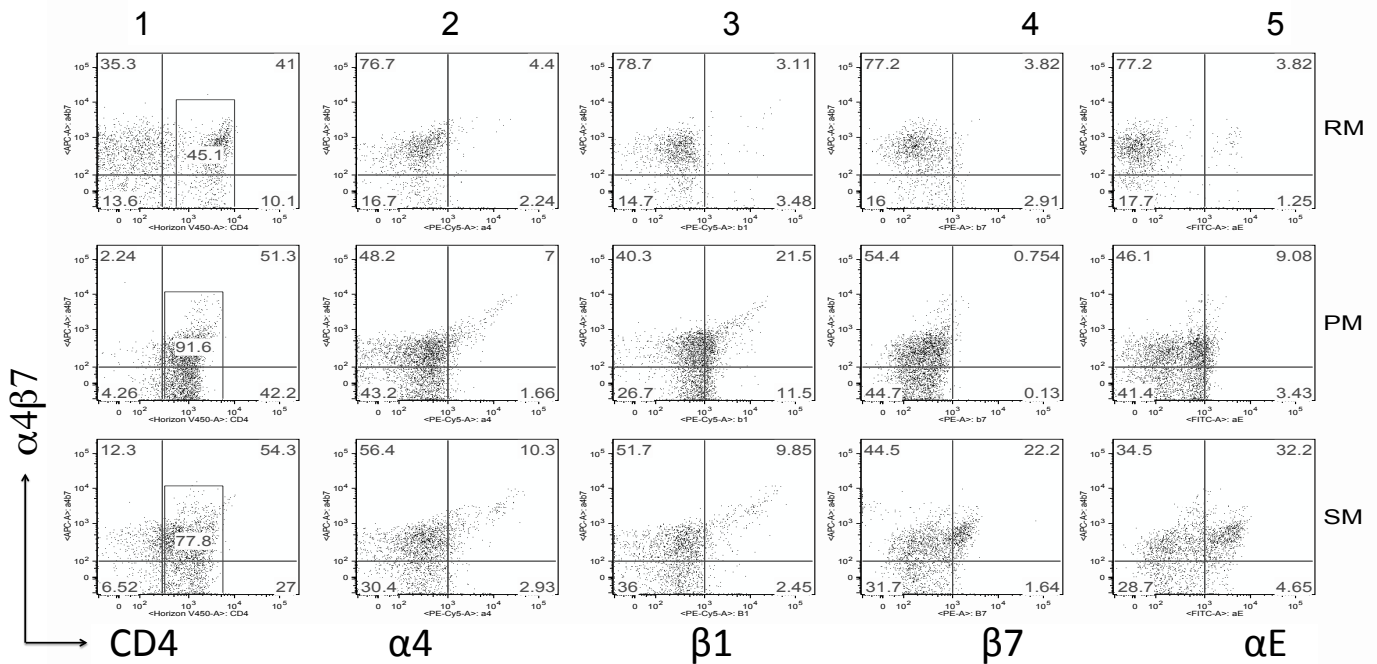

**Supplemental Figure 1.** (A) Representative profile of the gating strategies utilized to define the percentages of  $CD4^+$  T cells expressing  $\alpha 4\beta 7$ ,  $\alpha 4$ ,  $\beta 1$ ,  $\beta 7$ , and  $\alpha E$  in cells isolated from gut biopsies (B) Representative profiles of the flow cytometric analysis of the pairing of  $\alpha 4$ ,  $\beta 1$ ,  $\beta 7$ ,  $\alpha E$  with  $\alpha 4\beta 7$  integrins (columns 2-5, respectively) from RM (rhesus macaques, top row), PM (pigtailed macaques, middle row) and SM (sooty mangabeys, bottom row). Column 1 shows the profile of  $\alpha 4\beta 7$  expression by  $CD4^+$  T cells from cells isolated from gut tissues. Similar analysis were performed as described in Fig. 2C.

Negative Control

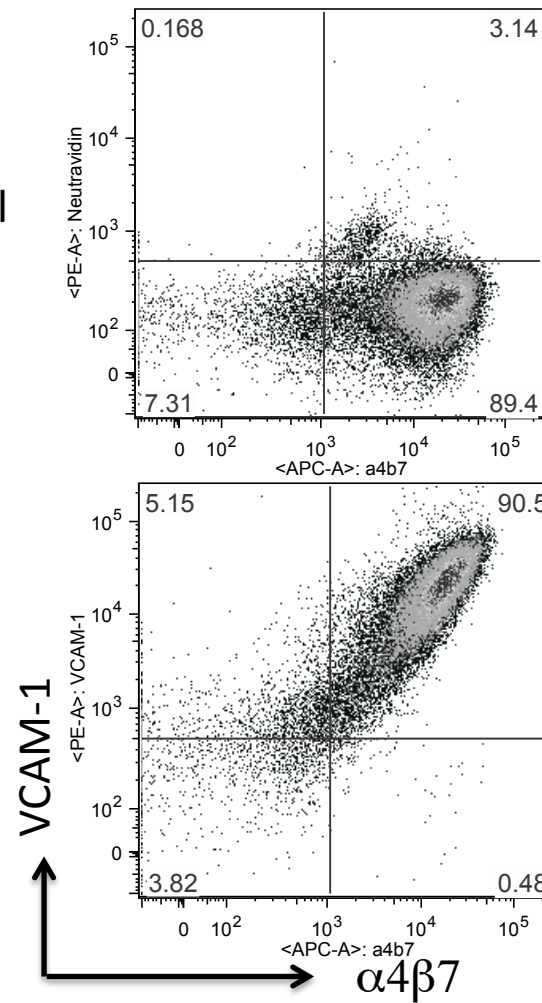

**Supplemental Figure 2.** Studies of the co-expression of  $\alpha 4\beta 1$  and  $\alpha 4\beta 7$  integrins on the gated population of CD3<sup>+</sup>, CD4<sup>+</sup> T cells from rhesus macaques. The top panel shows the staining of the APC-conjugated anti- $\alpha 4\beta 7$  mAb along with PE-avidin (background control). The bottom panel shows the profile of the co-staining of the CD3<sup>+</sup>, CD4<sup>+</sup> T cells using APC-conjugated anti- $\alpha 4\beta 7$  with biotinylated VCAM-1 followed by PE-avidin

**Supplemental Table 1.** GenBank accession numbers of retrieved  $\alpha 4$ ,  $\beta 7$ ,  $\alpha E$  and CCR5 promoter sequences used in the phylogenetic analyses of the study

| <b>SPECIES</b>             | $\alpha 4$     | $\alpha E$               | $\beta 7$      | CCR5           |
|----------------------------|----------------|--------------------------|----------------|----------------|
| <i>Homo sapiens</i>        | NC_000002.11   | NW_004929405.1           | NC_000012.11   | AF032132.1     |
| <i>Gorilla gorilla</i>     | NC_018426.1    | NC_018441.1              | NC_018436.1    | AF252560.1     |
| <i>Pan troglodytes</i>     | NC_006470.3    | NC_006484.3              | NC_006479.3    | AF252558.1     |
| <i>Pan paniscus</i>        | NW_003870546.1 | NW_003870286.1           | NW_003870627.1 | DQ482439.1     |
| <i>Pongo abelii</i>        | NC_012593.1    | NC_012608.1              | NC_012603.1    | NW_002913658.1 |
| <i>Nomascus leucogenys</i> | NC_019837.1    | -----                    | NC_019826.1    | -----          |
| <i>Macaca mulatta</i>      | -----          | AC191829.4<br>AC197790.3 | NW_001096622.1 | AC198716.8     |
| <i>Macaca fascicularis</i> | -----          | NC_022287.1              | -----          | AF252565.1     |
| <i>Macaca nemestrina</i>   | -----          | -----                    | -----          | AF252566.1     |
| <i>Papio anubis</i>        | NC_018163.1    | NC_018167.1              | NC_018162.1    | AF252564.1     |
| <i>Cercocebus atys</i>     | -----          | -----                    | -----          | AF252572.1     |
| <i>Chlorocebus sabaues</i> | -----          | NC_023657.1              | -----          | AF252581.1     |
| <i>Samiri boliviensis</i>  | NW_003943608.1 | NW_003943657.1           | -----          | NW_003943621.1 |
| <i>Callithrix jacchus</i>  | NC_013901.1    | -----                    | NC_013904.1    | AF252597.1     |
